# Supplementary material for: Hospitalization Incidence, Mortality, and Seasonality of Common Respiratory Viruses Over a Period of 15 Years in a Developed Subtropical City
Source: PubMed Central journal article supplement — Medicine (Baltimore). 2015 Nov 20;94(46):e2024. doi: 10.1097/MD.0000000000002024 (PMC4652819; doi:10.1097/md.0000000000002024), 2015-11-20

**e-Table 1. Age- and sex-specific incidence of hospitalization due to common respiratory viruses, 1998 to 2012**

| Mean annual incidence of hospitalization per 10,000 population |                          |        |             |       |            |       |                             |        |                       |       |                       |      |                       |       |
|----------------------------------------------------------------|--------------------------|--------|-------------|-------|------------|-------|-----------------------------|--------|-----------------------|-------|-----------------------|------|-----------------------|-------|
| Age (yr)                                                       | Influenza A <sup>1</sup> |        | Influenza B |       | Adenovirus |       | Respiratory syncytial virus |        | Parainfluenza virus 1 |       | Parainfluenza virus 2 |      | Parainfluenza virus 3 |       |
|                                                                | M                        | F      | M           | F     | M          | F     | M                           | F      | M                     | F     | M                     | F    | M                     | F     |
| <1                                                             | 118.10                   | 108.86 | 19.81       | 18.07 | 29.27      | 22.28 | 341.41                      | 266.71 | 37.13                 | 32.00 | 4.33                  | 5.48 | 111.79                | 68.72 |
| 1-2                                                            | 113.72                   | 99.01  | 21.31       | 23.00 | 54.34      | 41.33 | 142.67                      | 129.41 | 30.96                 | 29.22 | 2.76                  | 1.95 | 60.37                 | 49.56 |
| 3-4                                                            | 66.93                    | 57.13  | 25.47       | 22.29 | 55.22      | 40.41 | 39.32                       | 44.53  | 16.47                 | 13.56 | 2.64                  | 2.58 | 6.92                  | 7.74  |
| 5-9                                                            | 18.52                    | 15.40  | 13.5        | 12.29 | 10.92      | 8.91  | 3.50                        | 2.70   | 2.21                  | 2.27  | 1.01                  | 0.93 | 0.76                  | 1.12  |
| 10-14                                                          | 4.82                     | 3.45   | 3.00        | 2.67  | 1.10       | 0.68  | 0.78                        | 0.64   | 0.28                  | 0.19  | 0.23                  | 0.08 | 0.32                  | 0.40  |
| 15-24                                                          | 1.16                     | 1.30   | 0.50        | 0.48  | 0.04       | 0.19  | 0.20                        | 0.22   | 0.08                  | 0.04  | 0.05                  | 0.05 | 0.08                  | 0.14  |
| 25-34                                                          | 0.91                     | 1.18   | 0.20        | 0.40  | 0.05       | 0.12  | 0.08                        | 0.13   | 0.02                  | 0.02  | 0.03                  | 0.04 | 0.05                  | 0.06  |
| 35-44                                                          | 0.74                     | 0.74   | 0.27        | 0.23  | 0.05       | 0.09  | 0.12                        | 0.12   | 0.08                  | 0.01  | 0.00                  | 0.04 | 0.08                  | 0.10  |
| 45-54                                                          | 1.25                     | 1.01   | 0.28        | 0.34  | 0.01       | 0.01  | 0.23                        | 0.21   | 0.05                  | 0.05  | 0.01                  | 0.01 | 0.14                  | 0.21  |
| 55-59                                                          | 2.30                     | 2.04   | 0.54        | 0.24  | 0.08       | 0.06  | 0.50                        | 0.46   | 0.08                  | 0.17  | 0.09                  | 0.00 | 0.38                  | 0.34  |
| 60-64                                                          | 4.25                     | 3.03   | 1.32        | 0.82  | 0.11       | 0.06  | 0.96                        | 1.13   | 0.19                  | 0.22  | 0.00                  | 0.00 | 0.79                  | 0.32  |
| 65-74                                                          | 10.38                    | 7.28   | 2.11        | 0.89  | 0.15       | 0.04  | 2.09                        | 2.09   | 0.67                  | 0.51  | 0.11                  | 0.15 | 1.67                  | 1.35  |
| >74                                                            | 33.86                    | 27.6   | 7.48        | 4.87  | 0.64       | 0.23  | 10.04                       | 10.15  | 3.17                  | 1.89  | 0.71                  | 0.29 | 5.77                  | 5.45  |

<sup>1</sup>Influenza A data of 2009 was not included as it was dominated by pandemic.

e-Table 2. Age- and sex-specific mortality due to common respiratory viruses, 1998 to 2012

| Mean annual mortality per 1,000,000 population |                          |        |             |       |            |      |                             |       |                       |       |                       |      |                       |       |
|------------------------------------------------|--------------------------|--------|-------------|-------|------------|------|-----------------------------|-------|-----------------------|-------|-----------------------|------|-----------------------|-------|
| Age (yr)                                       | Influenza A <sup>1</sup> |        | Influenza B |       | Adenovirus |      | Respiratory syncytial virus |       | Parainfluenza virus 1 |       | Parainfluenza virus 2 |      | Parainfluenza virus 3 |       |
|                                                | M                        | F      | M           | F     | M          | F    | M                           | F     | M                     | F     | M                     | F    | M                     | F     |
| <1                                             | 0.00                     | 0.00   | 0.00        | 0.00  | 29.56      | 0.00 | 74.16                       | 0.00  | 0.00                  | 0.00  | 33.89                 | 0.00 | 63.46                 | 0.00  |
| 1-2                                            | 0.00                     | 0.00   | 0.00        | 0.00  | 30.65      | 0.00 | 36.81                       | 34.79 | 0.00                  | 0.00  | 0.00                  | 0.00 | 0.00                  | 17.40 |
| 3-4                                            | 0.00                     | 0.00   | 0.00        | 0.00  | 17.86      | 0.00 | 9.53                        | 0.00  | 0.00                  | 0.00  | 0.00                  | 0.00 | 0.00                  | 0.00  |
| 5-9                                            | 0.00                     | 0.00   | 0.00        | 0.00  | 0.00       | 5.18 | 6.10                        | 6.61  | 0.00                  | 0.00  | 0.00                  | 0.00 | 0.00                  | 0.00  |
| 10-14                                          | 3.34                     | 0.00   | 0.00        | 0.00  | 0.00       | 0.00 | 0.00                        | 4.95  | 0.00                  | 0.00  | 0.00                  | 0.00 | 0.00                  | 0.00  |
| 15-24                                          | 1.62                     | 0.00   | 1.51        | 0.00  | 0.00       | 0.00 | 0.00                        | 0.00  | 0.00                  | 0.00  | 0.00                  | 0.00 | 0.00                  | 0.00  |
| 25-34                                          | 3.20                     | 1.30   | 0.00        | 0.00  | 0.00       | 0.00 | 0.00                        | 1.29  | 0.00                  | 0.00  | 0.00                  | 0.00 | 0.00                  | 1.11  |
| 35-44                                          | 2.98                     | 1.04   | 0.00        | 0.00  | 0.00       | 0.00 | 3.32                        | 1.93  | 0.00                  | 0.00  | 0.00                  | 0.00 | 0.00                  | 0.00  |
| 45-54                                          | 4.38                     | 2.34   | 0.00        | 2.49  | 0.00       | 0.00 | 0.00                        | 2.45  | 0.00                  | 1.07  | 0.00                  | 0.00 | 0.00                  | 0.00  |
| 55-59                                          | 14.01                    | 2.72   | 0.00        | 0.00  | 5.25       | 0.00 | 0.00                        | 3.41  | 0.00                  | 2.54  | 0.00                  | 0.00 | 5.69                  | 0.00  |
| 60-64                                          | 25.07                    | 3.60   | 6.59        | 0.00  | 0.00       | 0.00 | 3.29                        | 9.60  | 3.29                  | 0.00  | 0.00                  | 0.00 | 3.29                  | 0.00  |
| 65-74                                          | 70.44                    | 27.80  | 21.56       | 0.00  | 3.75       | 0.00 | 17.44                       | 11.02 | 10.49                 | 3.69  | 3.75                  | 0.00 | 6.75                  | 3.69  |
| >74                                            | 248.10                   | 182.70 | 44.47       | 20.71 | 6.40       | 4.10 | 71.11                       | 94.15 | 25.28                 | 31.46 | 20.56                 | 9.97 | 71.22                 | 34.78 |

<sup>1</sup>Influenza A data of 2009 was not included as it was dominated by pandemic

**e-Figure 1. Monthly mean temperature, mean relative humidity and total rainfall, 1998 – 2012**(recorded from Shatin station situated at the same district as the hospital where this study was conducted)

**e-Figure 2. Monthly mean global solar radiation and total sunshine duration, 1998 – 2012**(recorded from King's Park station situated 8 km south of Shatin district where this study was conducted).

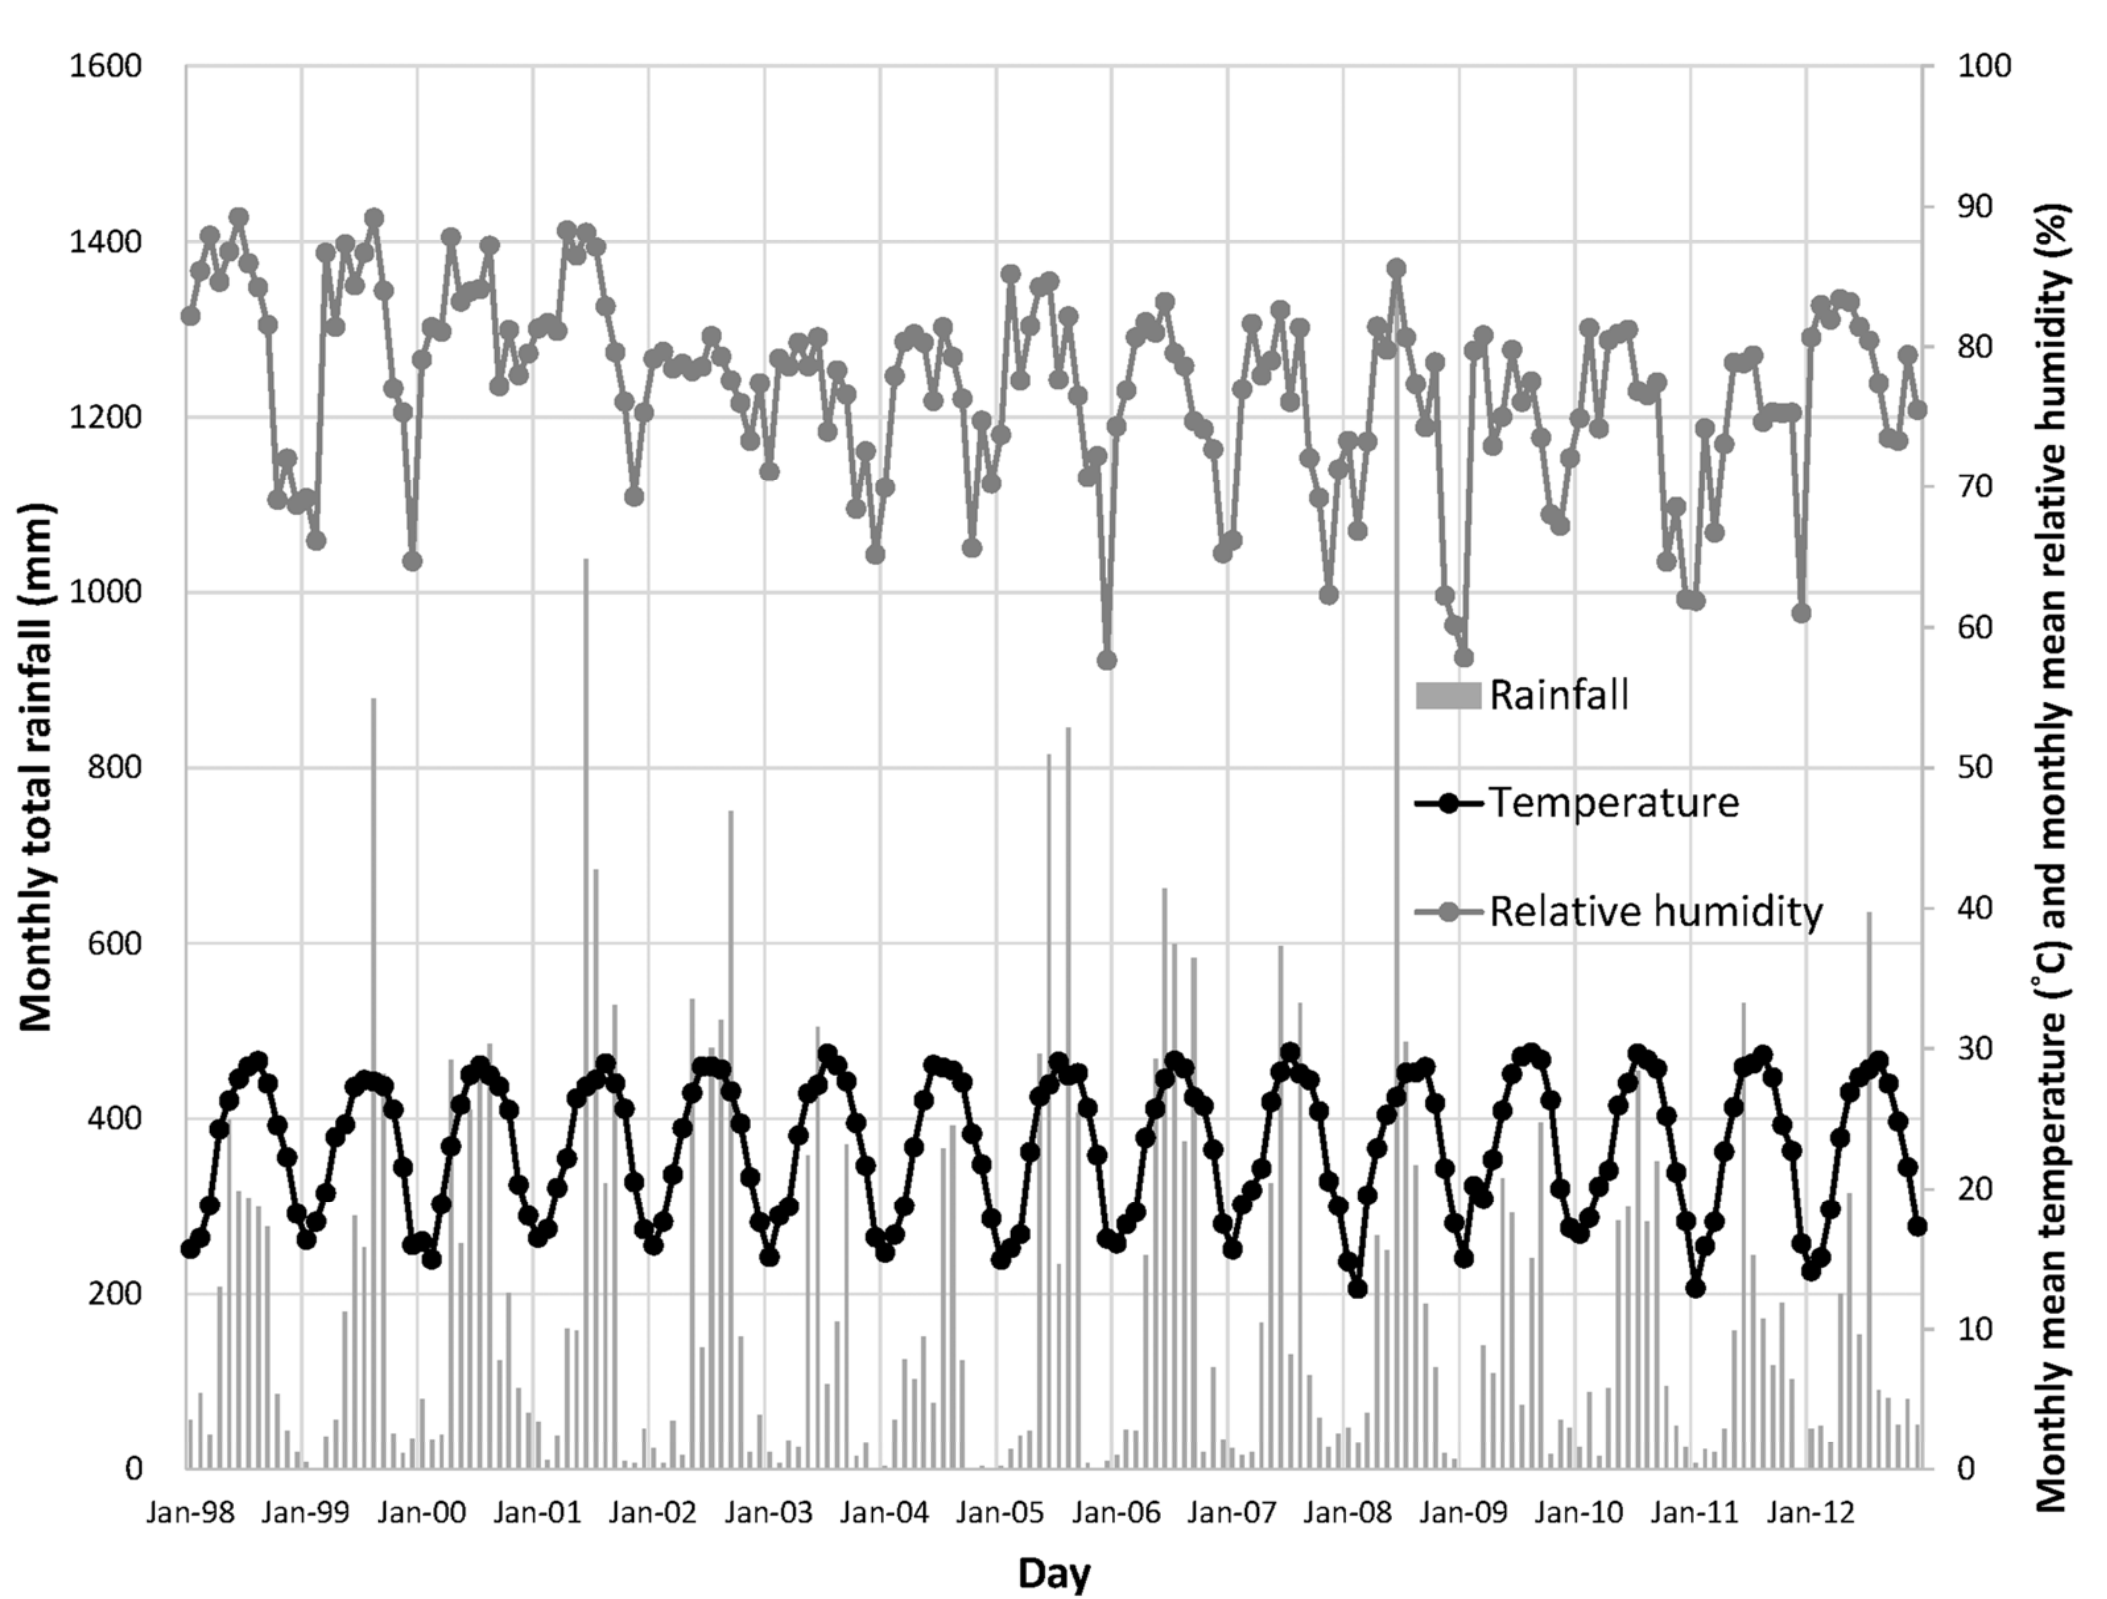

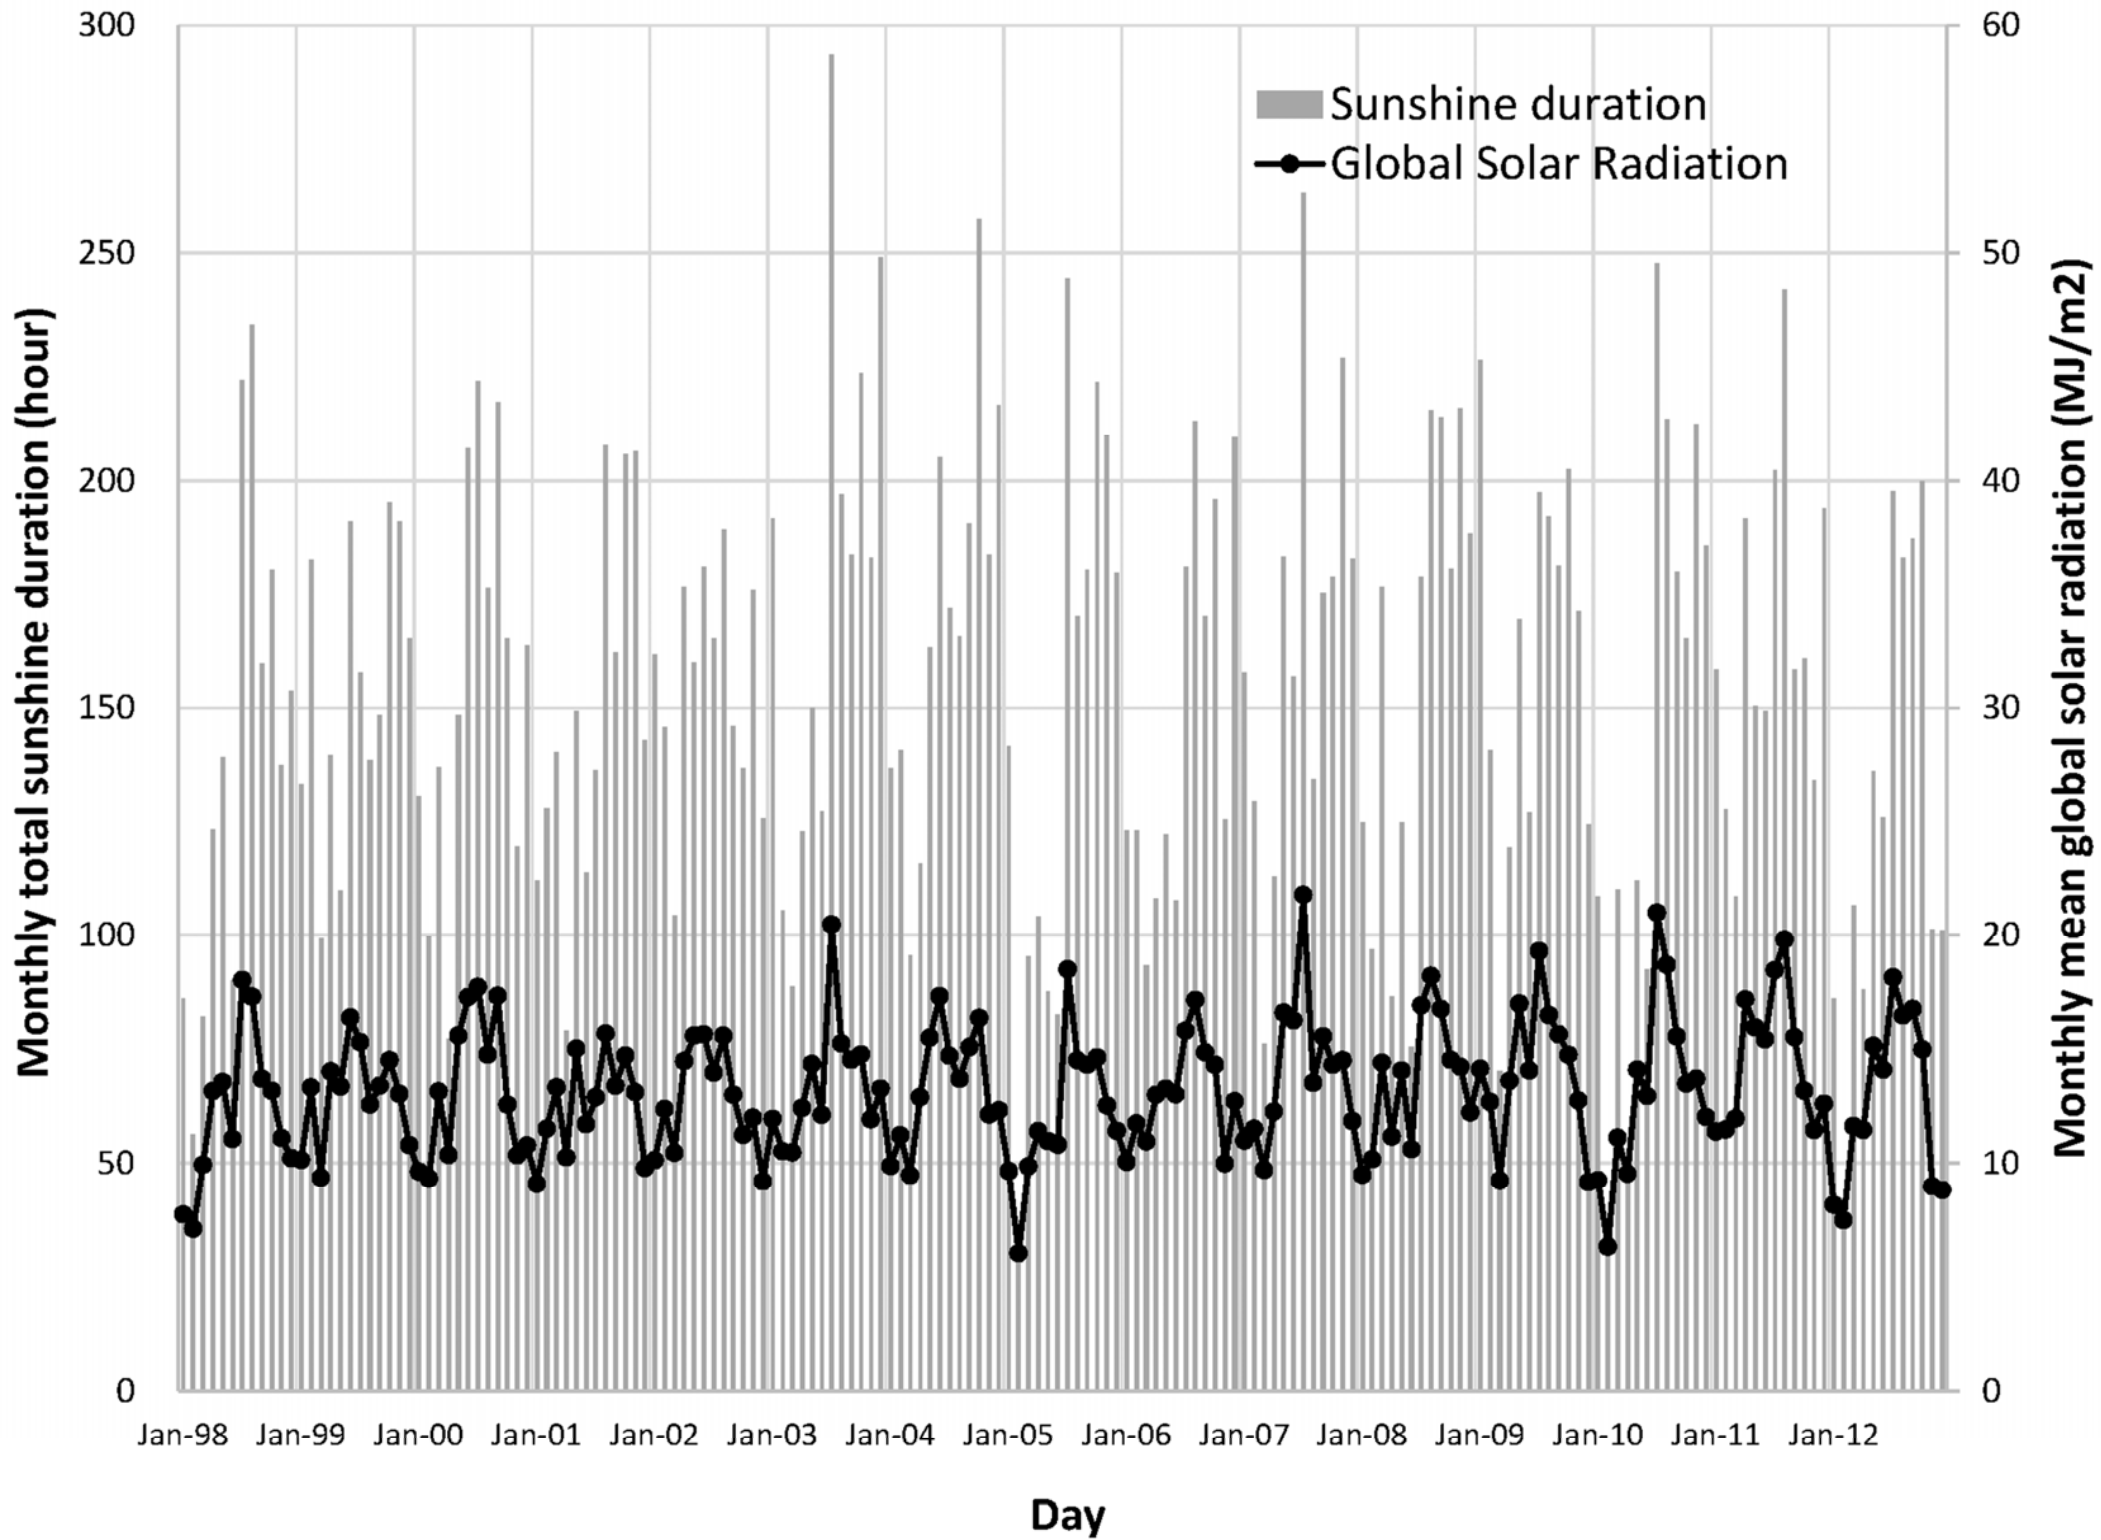

Supplement: medi-94-e2024-s001.pdf [file medi-94-e2024-s001.pdf]
